# Supplementary material for: Helix-based supramolecular isomerism of metal–organic framework
Source: Royal Society of Chemistry journal article supplement (doi:10.1039/c002677h), 2010-01-01
Supplement: c002677h.pdf [file c002677h.pdf]

## Electronic Supplementary Information

### Helix-based Supramolecular Isomerism of Metal-Organic Framework

Rui-Li Sang, and Li Xu\*

State Key Laboratory of Structural Chemistry, Fujian Institute of Research on the Structure of Matter,  
Chinese Academy of Science, Fuzhou, Fujian, 350002, China

E-mail: xli@fjirsm.ac.cn

**Table S1** Selected Bond Lengths (Å) and Bond Angles (deg) of **1-4<sup>a</sup>**

#### Complex 1

|                     |           |                    |           |                      |          |
|---------------------|-----------|--------------------|-----------|----------------------|----------|
| Cd(1)-O(3B)         | 2.27(5)   | Cd(1)-O(3A)        | 2.33(3)   | Cd(1)-O(2)           | 2.409(7) |
| Cd(1)-N(1)#2        | 2.358(5)  | Cd(1)-O(1)         | 2.543(11) |                      |          |
| O(3B)-Cd(1)-N(1)#2  | 77.61(12) | O(3A)-Cd(1)-N(1)#2 | 81.2(5)   | O(3A)#1-Cd(1)-N(1)#2 | 74.4(5)  |
| N(1)#2-Cd(1)-N(1)#3 | 155.2(2)  | O(3B)-Cd(1)-O(2)   | 92.41(16) | O(2)#1-Cd(1)-O(1)    | 125.7(3) |
| O(1)-Cd(1)-O(1)#1   | 76.8(4)   | O(3A)#1-Cd(1)-O(2) | 103.2(6)  | O(2)-Cd(1)-O(2)#1    | 175.2(3) |
| N(1)#2-Cd(1)-O(2)   | 96.6(2)   | N(1)#3-Cd(1)-O(2)  | 84.42(19) | N(1)#3-Cd(1)-O(1)    | 91.7(2)  |
| O(3B)-Cd(1)-O(1)    | 141.6(2)  | O(3A)-Cd(1)-O(1)   | 130.6(6)  | O(2)-Cd(1)-O(1)      | 49.5(3)  |
| O(3A)#1-Cd(1)-O(1)  | 152.6(6)  | N(1)#2-Cd(1)-O(1)  | 107.9(2)  | O(3A)-Cd(1)-O(2)     | 81.6(6)  |

#### Complex 2

|                   |            |                     |            |                     |            |
|-------------------|------------|---------------------|------------|---------------------|------------|
| Cd(1)-O(1)        | 2.333(4)   | Cd(1)-O(2)          | 2.405(3)   | Cd(1)-O(3)#1        | 2.245(3)   |
| Cd(1)-N(1)#3      | 2.301(3)   | Cd(1)-N(3)#2        | 2.251(3)   | Cd(1)-O(4)#1        | 2.512(4)   |
| O(1)-Cd(1)-O(2)   | 54.74(11)  | O(3)#1-Cd(1)-O(1)   | 146.97(13) | O(3)#1-Cd(1)-N(3)#2 | 118.89(13) |
| O(1)-Cd(1)-O(4)#1 | 108.05(14) | N(3)#2-Cd(1)-O(1)   | 88.80(12)  | O(3)#1-Cd(1)-N(1)#3 | 85.81(12)  |
| O(2)-Cd(1)-O(4)#1 | 87.55(13)  | N(1)#3-Cd(1)-O(1)   | 100.88(13) | N(3)#2-Cd(1)-N(1)#3 | 111.98(12) |
| O(3)#1-Cd(1)-O(2) | 94.23(12)  | N(1)#3-Cd(1)-O(2)   | 85.40(12)  | N(3)#2-Cd(1)-O(4)#1 | 98.05(12)  |
| N(3)#2-Cd(1)-O(2) | 142.68(11) | O(3)#1-Cd(1)-O(4)#1 | 53.95(12)  | N(1)#3-Cd(1)-O(4)#1 | 138.44(11) |

#### Complex 3

|                   |           |                     |           |                     |           |
|-------------------|-----------|---------------------|-----------|---------------------|-----------|
| Cd(1)-O(1)        | 2.336(2)  | Cd(1)-O(2)          | 2.347(2)  | Cd(1)-O(3)#3        | 2.526(2)  |
| Cd(1)-N(1)#1      | 2.275(2)  | Cd(1)-N(4)#2        | 2.283(2)  | Cd(1)-O(4)#3        | 2.290(2)  |
| N(1)#1-Cd(1)-O(1) | 110.69(8) | N(4)#2-Cd(1)-O(1)   | 102.32(8) | N(1)#1-Cd(1)-N(4)#2 | 101.76(9) |
| O(4)#3-Cd(1)-O(1) | 151.50(8) | N(1)#1-Cd(1)-O(2)   | 96.90(8)  | N(1)#1-Cd(1)-O(4)#3 | 91.23(8)  |
| N(4)#2-Cd(1)-O(2) | 155.48(8) | O(4)#3-Cd(1)-O(3)#3 | 53.96(7)  | N(4)#2-Cd(1)-O(4)#3 | 90.18(8)  |
| O(1)-Cd(1)-O(2)   | 55.69(8)  | N(4)#2-Cd(1)-O(3)#3 | 85.47(7)  | N(1)#1-Cd(1)-O(3)#3 | 144.74(8) |
| O(2)-Cd(1)-O(3)#3 | 88.42(7)  | O(1)-Cd(1)-O(3)#3   | 101.09(8) | O(4)#3-Cd(1)-O(2)   | 105.27(8) |

#### Complex 4

|                   |           |                   |           |                   |           |
|-------------------|-----------|-------------------|-----------|-------------------|-----------|
| Cd(1)-O(1)#1      | 2.273(3)  | Cd(1)-N(1)        | 2.307(3)  | Cd(1)-O(3)        | 2.404(3)  |
| O(1)#1-Cd(1)-N(1) | 97.97(12) | O(1)#2-Cd(1)-N(1) | 97.01(12) | N(1)#3-Cd(1)-N(1) | 98.42(16) |
| N(1)-Cd(1)-O(3)   | 85.11(13) | O(1)#1-Cd(1)-O(3) | 78.85(13) | O(1)#2-Cd(1)-O(3) | 85.13(12) |

O(1)#1-Cd(1)-O(1)#2 157.0(2) N(1)-Cd(1)-O(3)#3 174.94(11) O(3)-Cd(1)-O(3)#3 91.60(16)

<sup>a</sup> Symmetry code: for **2**: #1:  $x + 1, y, z$ ; #2:  $-x + 1, y + 1/2, -z + 3/2$ ; #3:  $x + 1, -y + 3/2, z + 1/2$ . For **3**: #1:  $-x, y - 1/2, -z + 1/4$ ; #2:  $y - 1/2, x, z - 1/4$ ; #3:  $y - 1/2, -x + 1/2, -z + 1/2$ ; For **4**: #1:  $x + 1/2, -y + 1/2, -z + 1$ ; #2:  $-y + 1/2, x + 1/2, z - 1$ ; #3:  $y, x, -z$ .

**Table S2** H-Bond lengths (Å) and angles (°) in **1–4**.

| D–H...A            | d(D–H) | d(H...A) | d(D...A)  | ∠(DHA) | symmetry code             |
|--------------------|--------|----------|-----------|--------|---------------------------|
| <b>Complex 1</b>   |        |          |           |        |                           |
| O(1W)–H(1W)⋯O(2W)  | 0.97   | 1.76     | 2.733(19) | 172.3  | $y, -x+y+1, -z+1$         |
| O(2W)–H(2W)⋯O(1)   | 0.83   | 2.49     | 2.978(18) | 118.7  |                           |
| O(3A)–H(3W)⋯O(2)   | 0.82   | 1.81     | 2.574(6)  | 155.9  | $x-y+1/3, -y+2/3, -z+7/6$ |
| <b>Complex 2</b>   |        |          |           |        |                           |
| O(1W)–H(1WB)⋯O(4)  | 0.86   | 2.03     | 2.822(4)  | 152.5  | $-x+1, y-1/2, -z+3/2$     |
| O(1W)–H(1WA)⋯O(1)  | 0.87   | 2.24     | 2.899(4)  | 132.4  | $-x+1, y-1/2, -z+3/2$     |
| <b>Complex 3</b>   |        |          |           |        |                           |
| O(1W)–H(1WA)⋯O(4)  | 0.93   | 2.15     | 2.970(6)  | 146.6  | $x+1, y, z$               |
| O(1W)–H(1WB)⋯O(1W) | 0.91   | 2.26     | 2.850(11) | 122.4  | $-x+3/2, y, -z+3/4$       |
| O(2W)–H(2WA)⋯O(2W) | 0.87   | 1.96     | 2.826(19) | 174.8  | $-x+1, -y+2, z$           |
| O(2W)–H(2WB)⋯O(1W) | 0.80   | 2.11     | 2.901(13) | 175.8  |                           |
| <b>Complex 4</b>   |        |          |           |        |                           |
| O(2)–H(2A)⋯O(3)#5  | 0.82   | 1.78     | 2.588(5)  | 166.8  | $y-1/2, -x+1/2, z+1$      |
| O(3)–H(3C)⋯O(3)#9  | 0.89   | 2.16     | 2.915(7)  | 142.4  | $-x+1, -y+1, z$           |
| O(3)–H(3D)⋯O(1)#10 | 0.85   | 2.23     | 2.985(5)  | 147.6  | $-y+1/2, x+1/2, z$        |
| O(3)–H(3D)⋯O(3)#4  | 0.85   | 2.48     | 3.126(6)  | 133.2  | $y, x, -z+1$              |

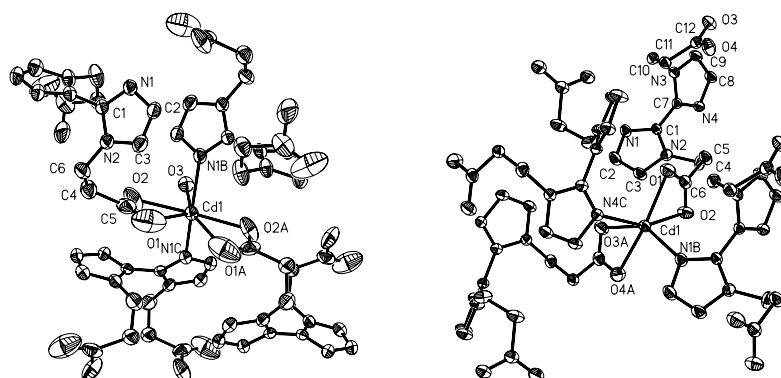

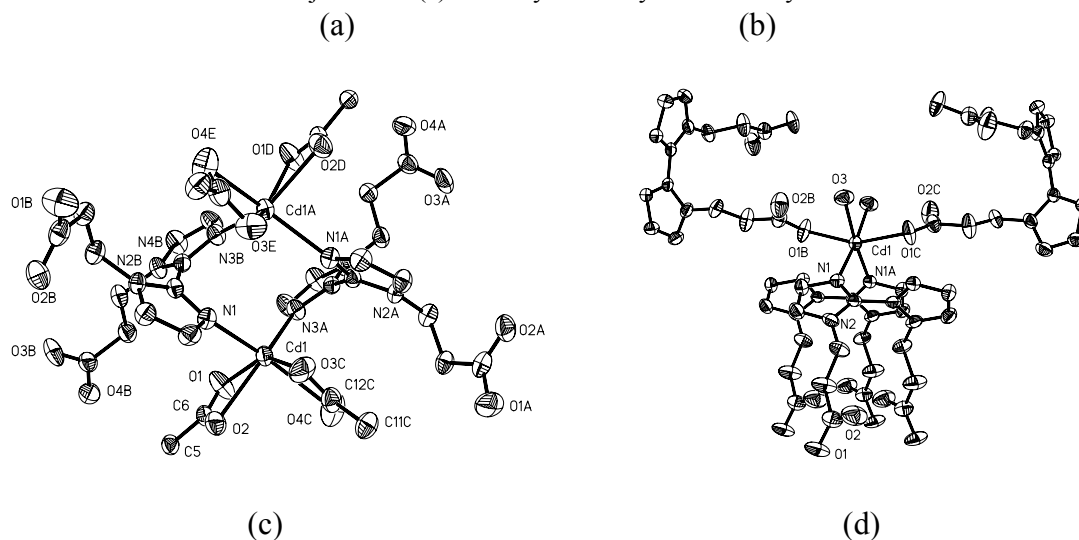

**Fig. S1.** The ORTEP drawing of the coordination environments of Cd(II) of **1-4** (a-d) with 50% probability thermal ellipsoids.

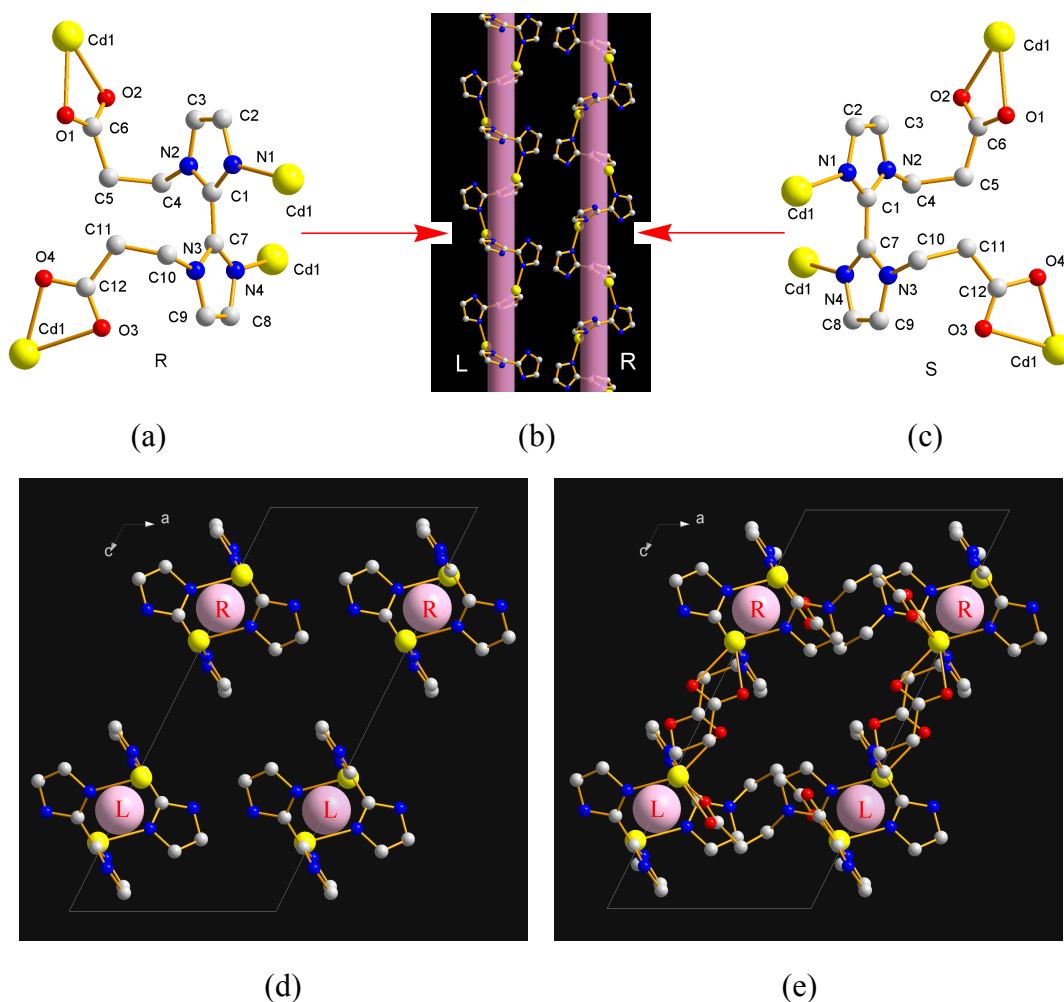

**Fig. S2.** (a), (c): Coordination modes of two chiral conformations (R-Prä<sub>2</sub>biim and S-Prä<sub>2</sub>biim ligand), (b) view of the two types of helical chains along the *a* direction, (d) along the *b* direction and (e) showing the connection of these helical chains, in compound **2**. Color code: yellow, Cd; red, O; blue, N; white, C atoms.

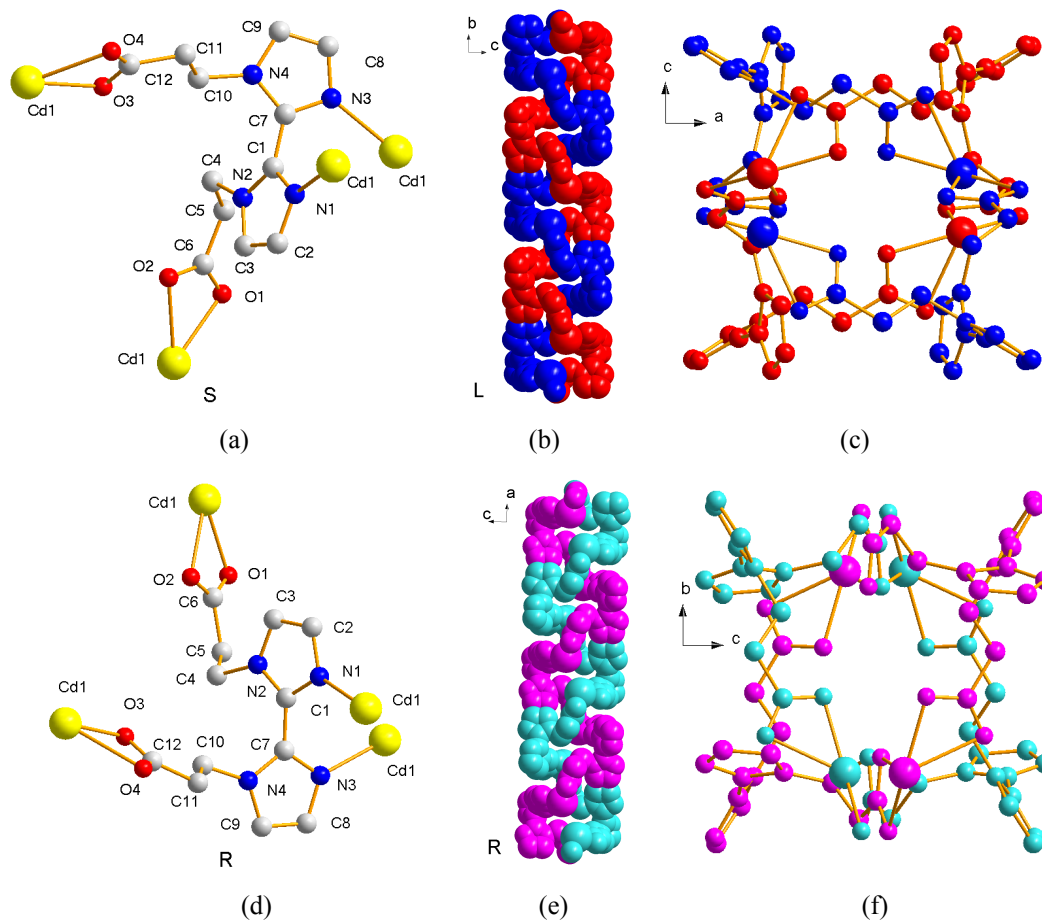

**Fig. S3.** View of the helices in compound **3**: (a), (d) coordination modes of two chiral conformations (S-Pra<sub>2</sub>biim and R-Pra<sub>2</sub>biim ligand) (b) space-filling diagrams of two intertwined left-handed helices along the *b* direction, (c) ball-and stick diagram two intertwined left-handed helices along the *b* direction, (d) space-filling diagrams of two intertwined right-handed helices along the *a* direction, and (e) ball-and stick diagram two intertwined right-handed helices along the *a* direction.

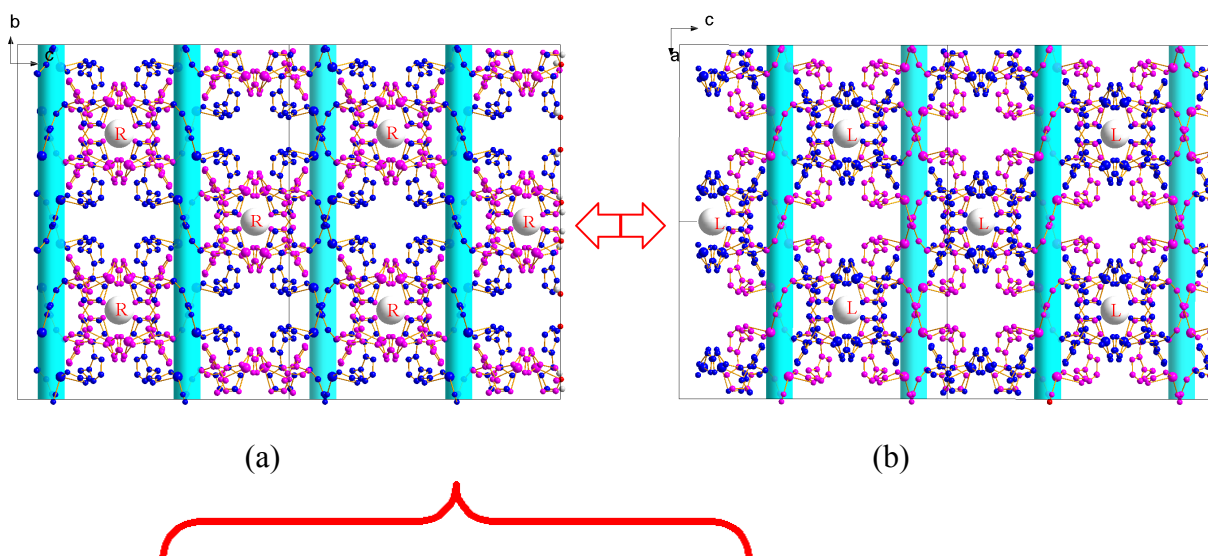



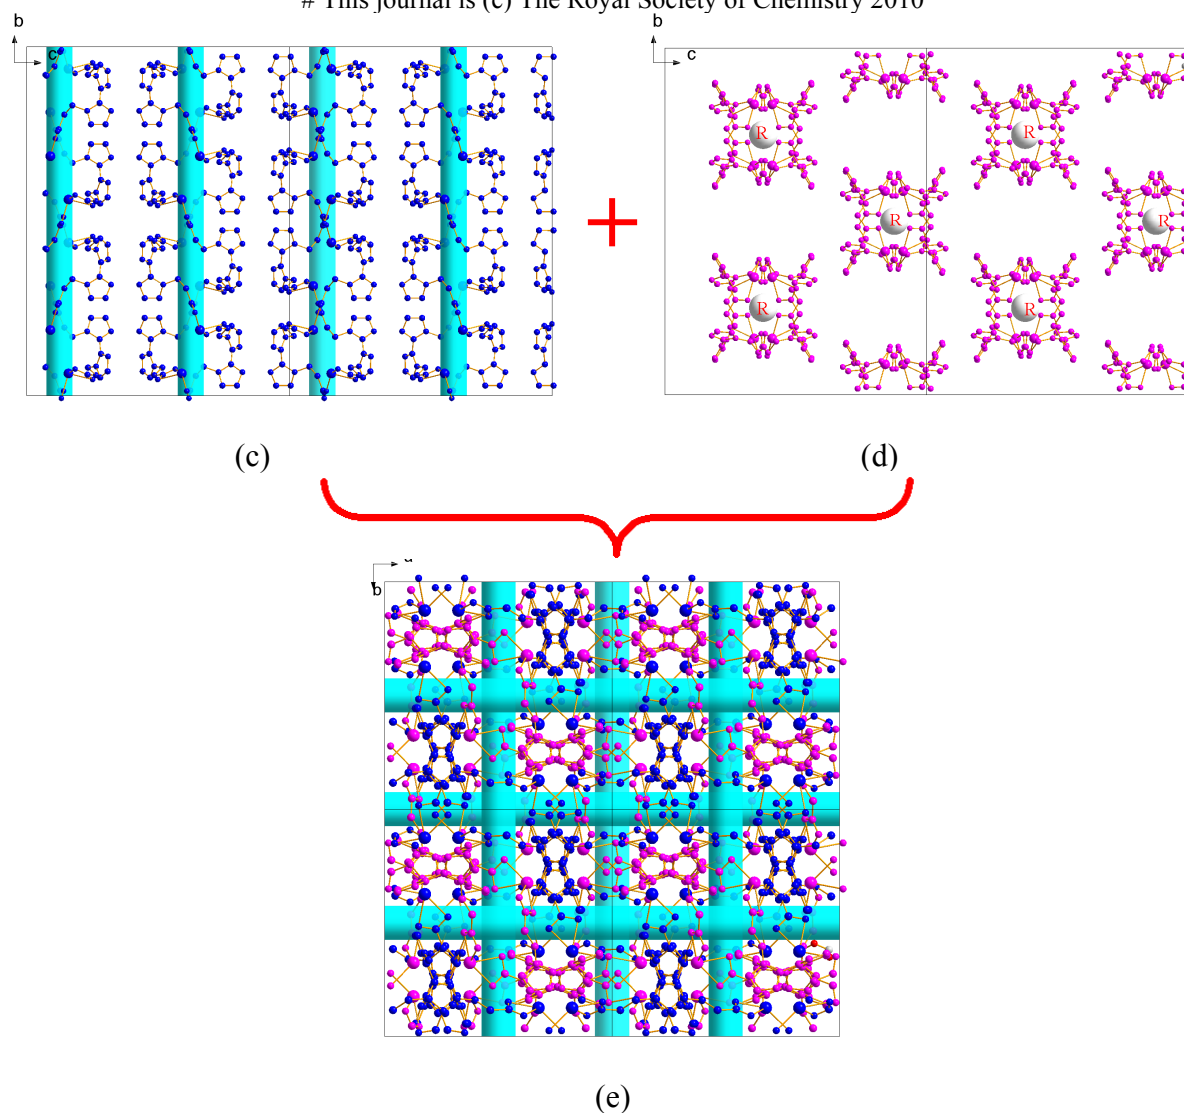

**Fig. S4.** View of the diagrammatic sketch of the construction of the structure of **3**. (a) The open-framework structure, showing the intertwined helices along  $a$  direction. (b) Along  $b$  direction. (c) Two intertwined right-handed helices along the  $a$  direction. (d) Two intertwined left-handed helices along the  $b$  direction. (e) The open-framework structure, showing the intertwined helices along along  $c$  direction.

The left-handed double stranded helices along  $b$  direction: blue sticks. The right-handed double stranded helices along  $a$  direction: pink sticks. Similarly hereinafter.

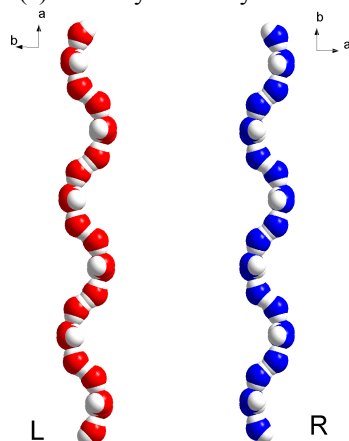

**Fig. S5.** Space-filling diagram of the helical water chains. L/R: left/right-handed helical chains, respectively.

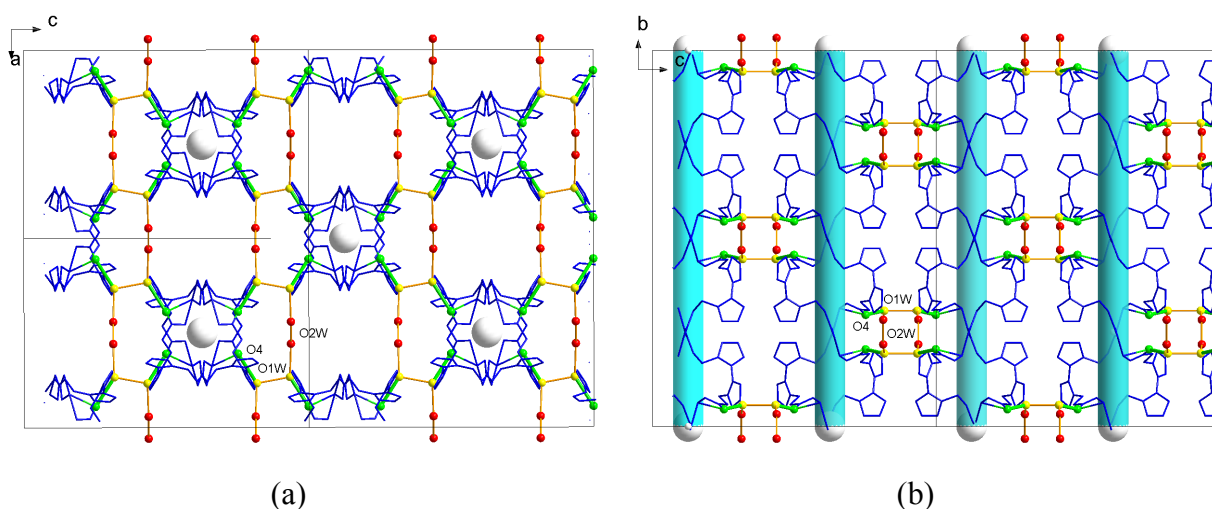

**Fig. S6.** View of the H-bond between the left-handed helical water chains along *a* direction and the left-handed double stranded helices along *b* direction in the structure of **3**. View along *b* direction (a); View along *a* direction (b); the right-handed helical water chains along *b* direction, the right-handed double stranded helices along *a* direction and H atoms are omitted.

The coordinated carboxylic oxygen atom O4: bright green ball. The left-handed helical water chains along *a* direction filled in the channels is formed by two independent lattice water molecules [O1W (yellow ball), O2W (red ball)]. The H-bond (bright green stick) between the coordinated carboxylic oxygen atom O4 and the left-handed helical water chains [O(1W)-H(1WA)...O(4): 2.970(6) Å]. The H-bond (orange stick) in the helical water chains [O(1W)-H(1WB)...O(1W) 2.850(11); O(2W)-H(2WA)...O(2W) 2.826(19); O(2W)-H(2WB)...O(1W) 2.901(13) Å].

As shown in Fig. S6, two independent lattice water molecules (O1W, O2W) within channels along *a* direction are hydrogen bonded to each other [O(1W)-H(1WB)...O(1W) 2.850(11); O(2W)-H(2WA)...O(2W) 2.826(19); O(2W)-H(2WB)...O(1W) 2.901(13) Å] forming left-handed helical water chains along *a* axis, and there are hydrogen bonds between the left-handed helical water chains along *a* direction and the left-handed double stranded helices along *b* direction [O(1W)-H(1WA)...O(4): 2.970(6) Å]. Similarly, two independent lattice water molecules (O1W,

O2W) within channels along *b* direction are hydrogen bonded to each other forming right-handed helical water chains along *b* axis, and there are hydrogen bonds between the right-handed helical water chains along *b* direction and the right-handed double stranded helices along *a* direction.

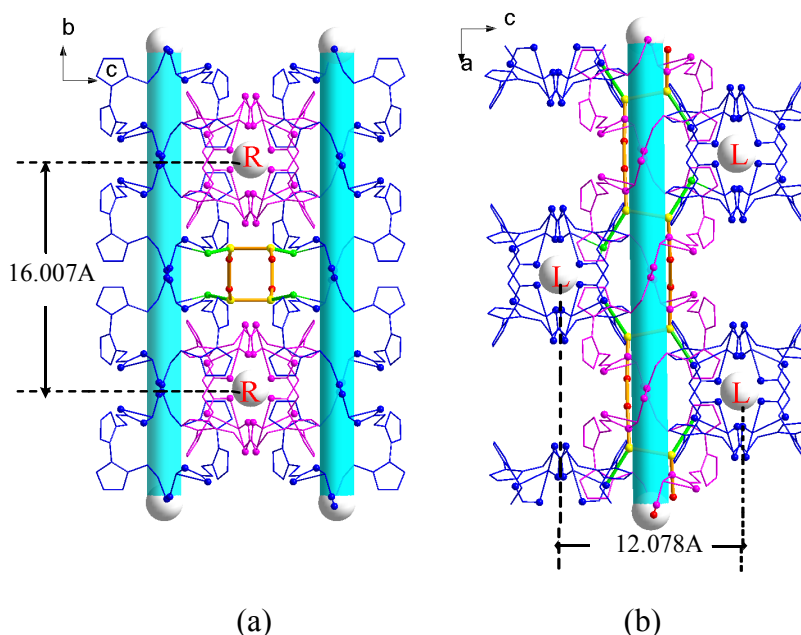

**Fig. S7.** View of the chiral channel built from the left-handed double stranded helices along *b* direction and two right-handed double stranded helices along *a* direction, and the left-handed helical water chains along *a* direction. View along *a* direction (a); View along *b* direction (b).

As shown in Fig. S7, the chiral channel are built from the left-handed double stranded helices along *b* direction and two right-handed double stranded helices along *a* direction, and there is the left-handed helical water chain along *a* axis within this channel. The distance between the center of two right-handed double stranded helices in *b* direction is 16.007 Å and that between the plane define the the left-handed double stranded helices in *c* direction is 12.078 Å.

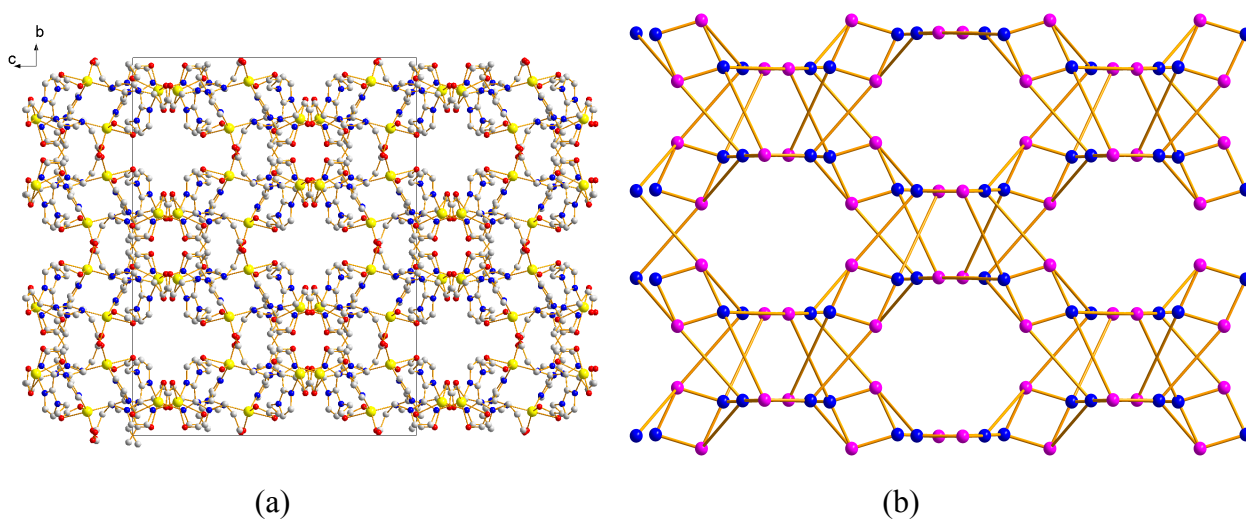

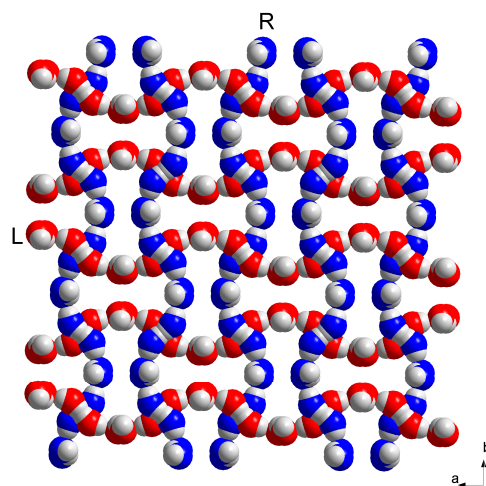

(c)

**Fig. S8.** The 3D structure of **3**, (a) the ball-and-stick representation, showing the channels, (b) schematic representation of 3D network with  $(4^3 \cdot 12^3)$  topology, (c) view of a pair of helical water chains (blue and red) along  $c$  direction, L/R: left/right-handed helical tube, respectively.

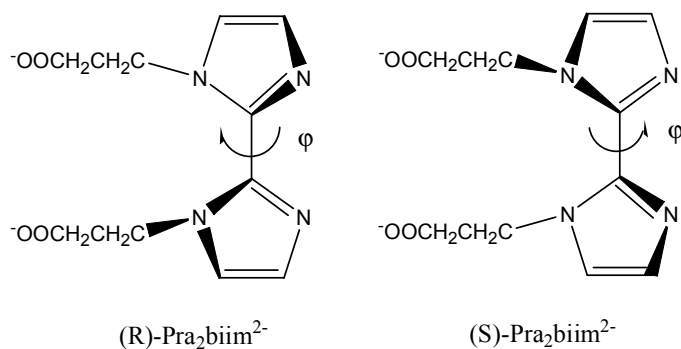

Achiral, when  $\varphi = 0^\circ$  or  $90^\circ$ ; Chiral, when  $0^\circ < \varphi < 90^\circ$  and  $90^\circ < \varphi < 180^\circ$

**Scheme 1** The configuration of Pra<sub>2</sub>biim<sup>2-</sup>.

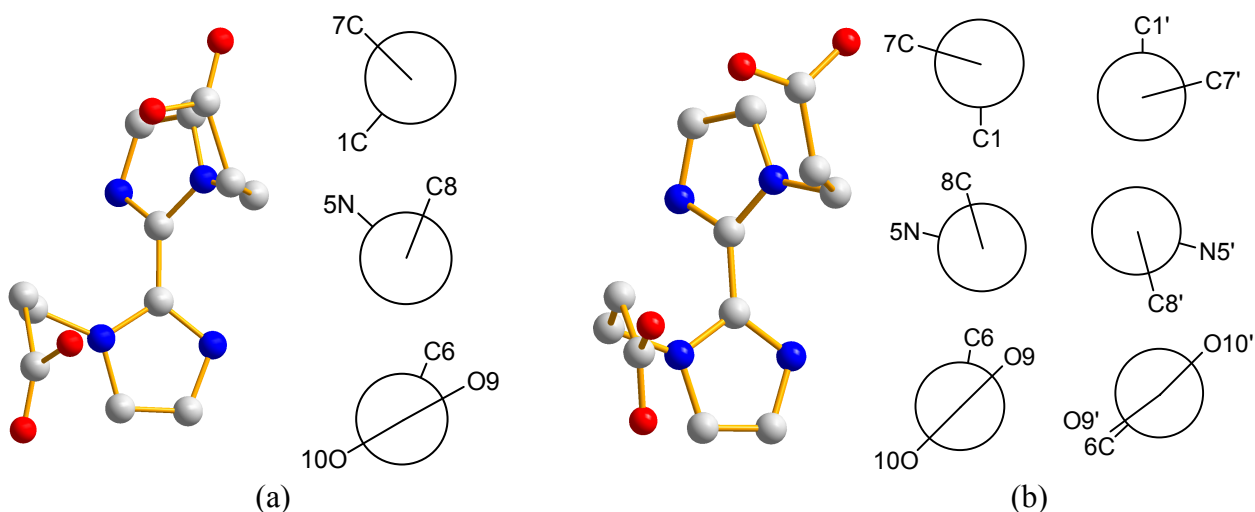

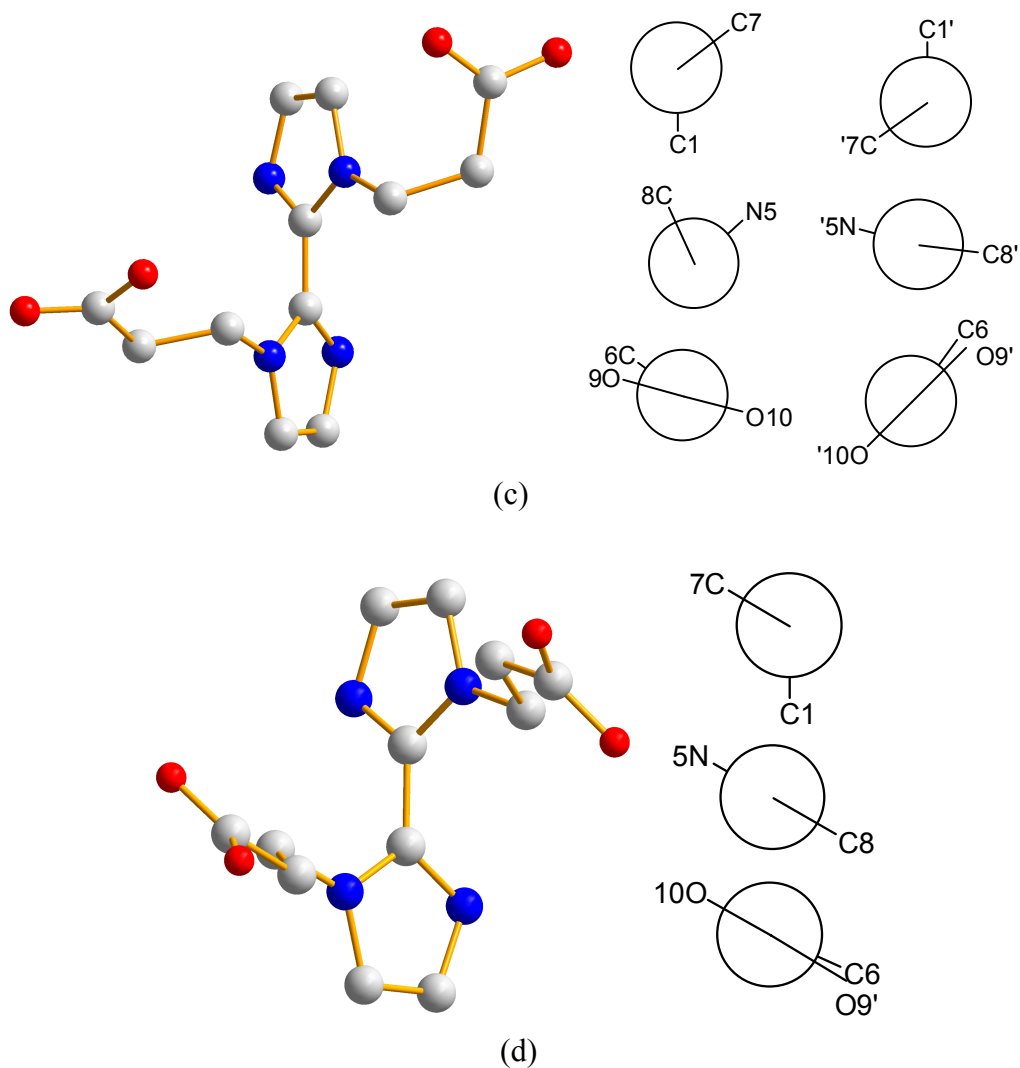

**Fig. S9.** The conformation of Pra<sub>2</sub>biim<sup>2-</sup> and the schematic representation of the conformations of the propionate arms. (a) **1**; (b) **2**; (c) **3**; (d) **4**.
